# Supplementary material for: A technique-driven materials categorisation scheme to support regulatory identification of nanomaterials
Source: Royal Society of Chemistry journal article supplement (doi:10.1039/c8na00175h), 2018-11-13
Supplement: c8na00175h1.pdf [file c8na00175h1.pdf]

1

**Supplementary information**

2

**to**

3

***A technique-driven materials categorisation scheme to support***

4

***regulatory identification of nanomaterials***

5

6 *Claire Gaillard, Agnieszka Mech, Wendel Wohlleben, Frank Babick, Vasile-Dan Hodoroba,*

7 *Antoine Ghanem, Stefan Weigel, Hubert Rauscher*

8

9

10

11

12

13

14

15

## 16 **Particles embedded in a matrix**

17 The materials categorisation system can also be applied, in a slightly extended form, to  
18 nanoparticles embedded in an article or in a formulation. In the example shown in Figure S1,  
19 this is done for a sunscreen lotion which contains titanium dioxide nanoparticles. In that case,  
20 the categorisation system is extended by two main criteria: (i) type of matrix and (ii) removal  
21 of non-particulate components. 'Removal' includes all means of separating the particulate  
22 components from the matrix, including filtering, digestion and ashing.

### 23 Type of matrix

24 The type of matrixes in which particles are embedded or suspended is also a necessary  
25 criterion to be taken into account in order to know which techniques can be applied. Three  
26 cases can be selected:

- 27 • Particles are embedded in a solid matrix
- 28 • Particles are embedded in a liquid/gel matrix
- 29 • Particles are suspended in a gas

30 If the particles cannot be removed from the matrix, the analysis must be performed directly  
31 on the embedded particles.

### 32 Removal of the non-particulate components and particle extraction

33 If the matrix can be separated without altering the particulate components, the techniques  
34 used to measure the latter can be the same as those used for materials with monotype and  
35 multiple types of particles. For instance, if the matrix of a sunscreen which contains particles  
36 of titanium dioxide can be removed, the techniques to analyse the remaining particles would  
37 be the same as for pristine titanium dioxide. A variety of procedures to separate the matrix in  
38 order to extract nanoparticles are described in the literature [1,2], including digestion methods  
39 to remove food matrices. However, such procedures must be compatible with the particles to  
40 extract them without modifying the particles during the extraction process.

41 The criterion of matrix removal can then be selected as follows:

42 • the non-particulate components can be separated (or alternatively the particles can be  
43 extracted). In that case, the conditions should also be specified.

44 • the non-particulate components cannot be separated (or the feasibility is unknown)

45 An example of the categorisation of a sunscreen containing coated titanium dioxide particles  
46 is presented in Figure S2. The non-particulate components can be removed and the type of  
47 matrix is a gel/liquid. The particulate material is a composite of the core-shell type, has three  
48 small dimensions and the exact shape is unknown. Due to the latter condition, the option  
49 ‘unknown’ has been chosen instead of ‘3 (spherical, equiaxial)’. Further, it is expected that  
50 the size range is between 20 and 120 nm and it is known that the particles are of only one  
51 type. A known specific property is size-dependent photon absorption, whereas others are also  
52 unknown, so that the corresponding boxes remain unfilled. Matching these characteristics  
53 with the technique performance table leads to EM and AFM as applicable techniques. The  
54 main limiting condition for this recommendation is the fact that the shape of the particles is  
55 not known.

56

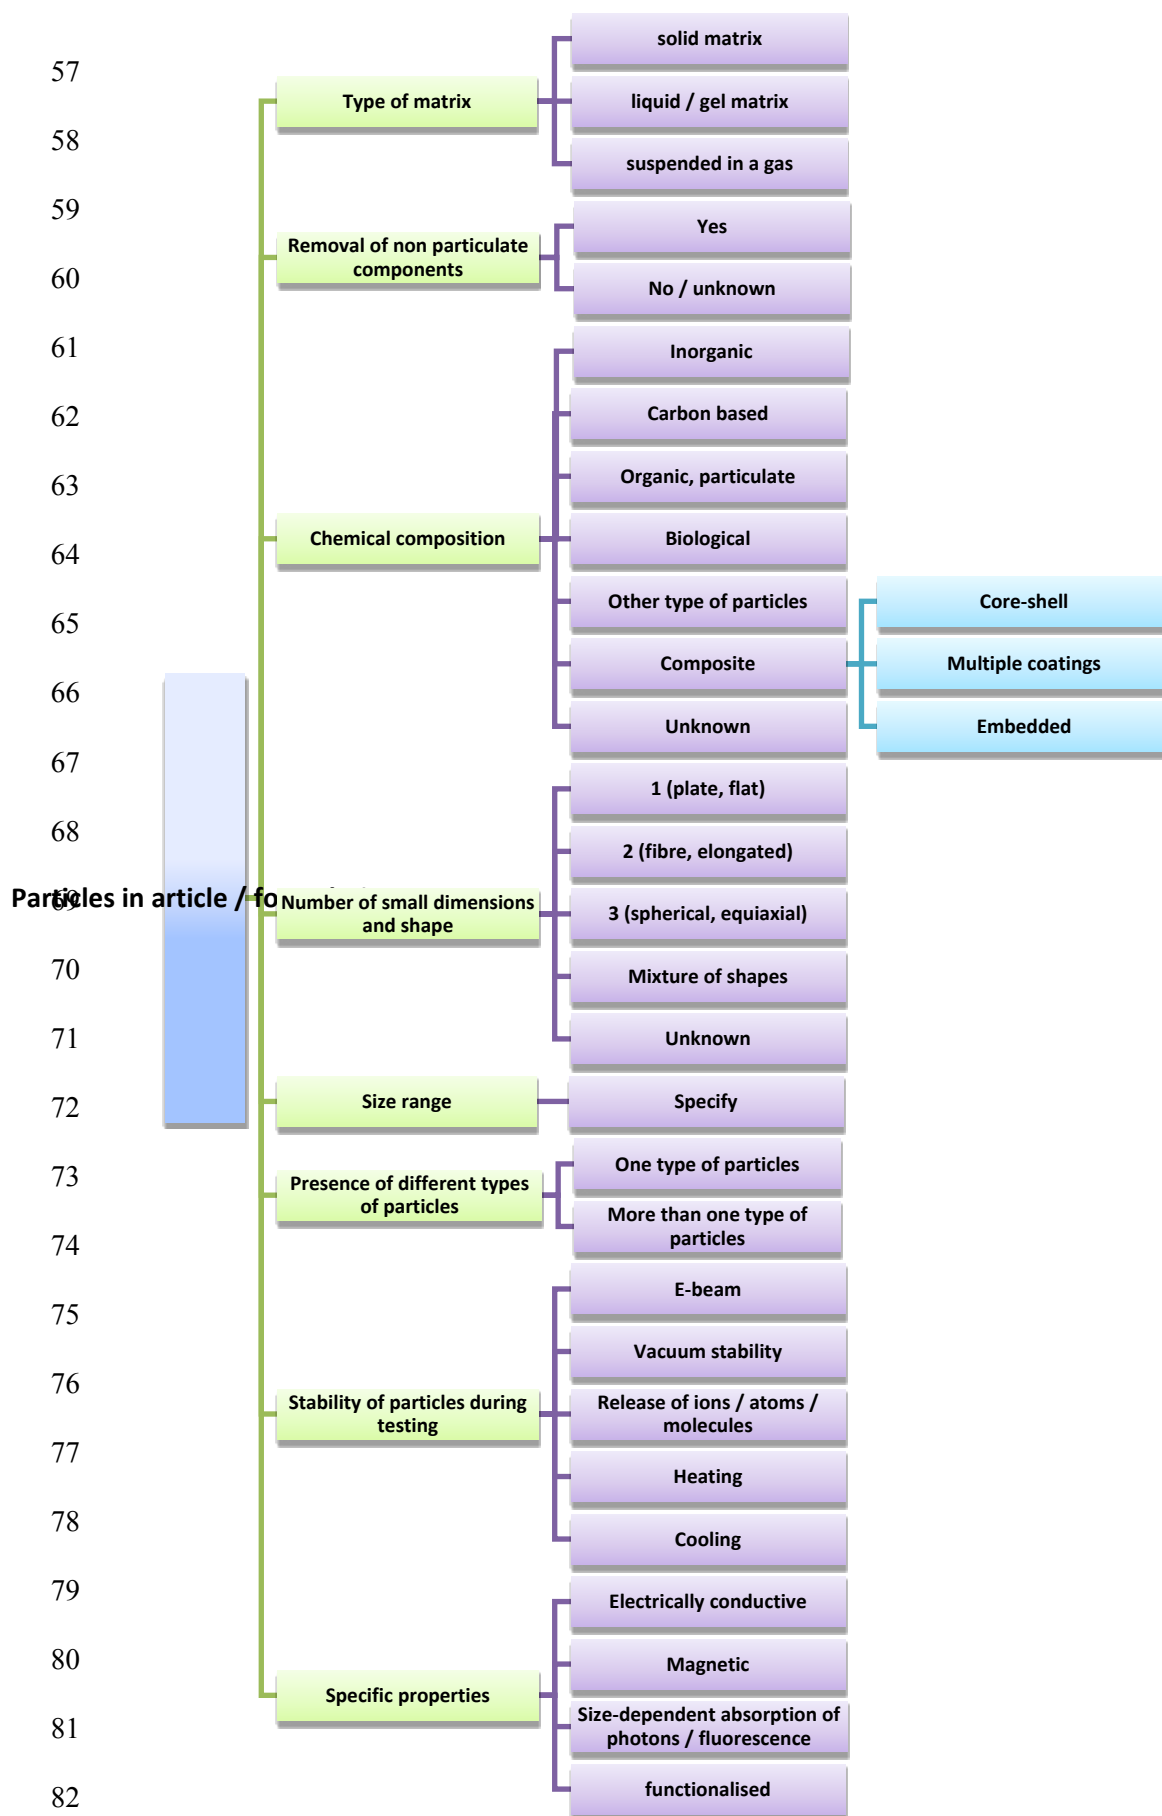

**Figure S1:** Scheme of the Material Categorisation System for an article / formulation that contains particles

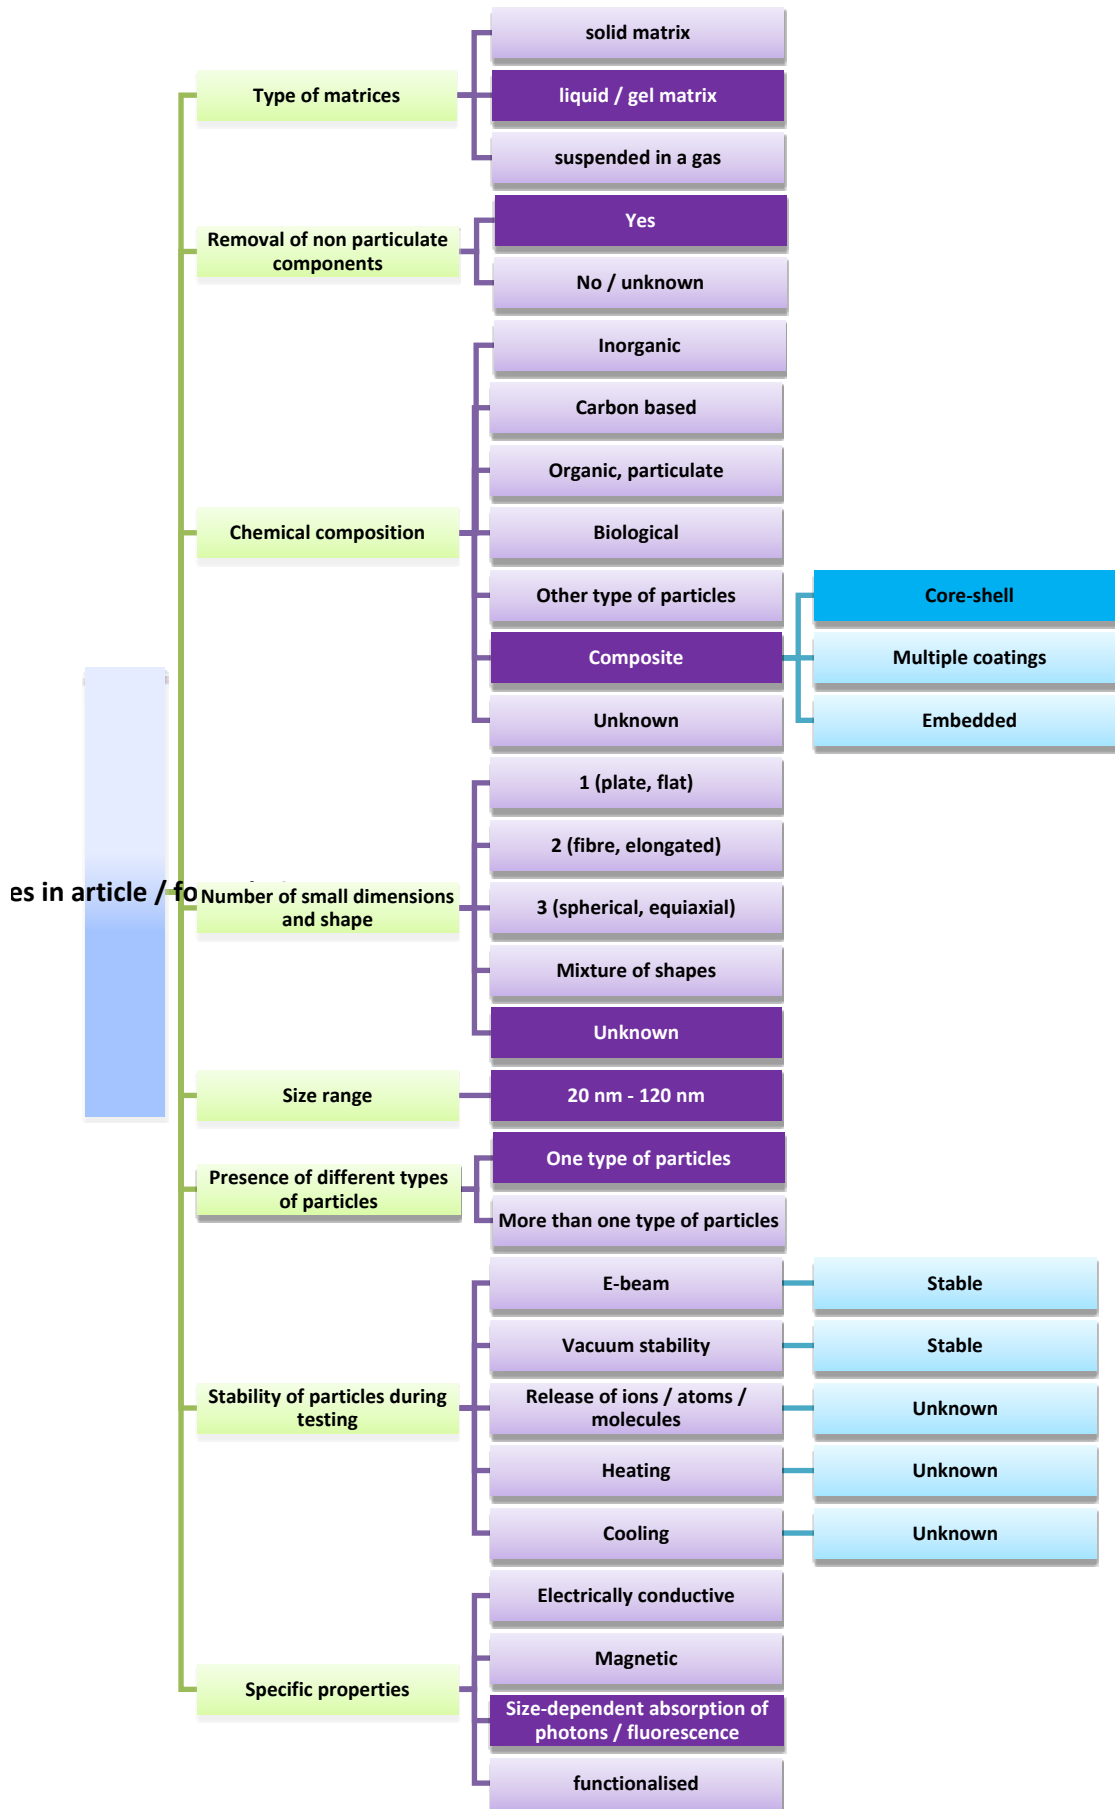

**Figure S2:** Scheme of the Material Categorisation System applied to coated titanium dioxide particles in a sunscreen formulation

## 83 References

- [1] Singh, G., Stephan, C., Westerhoff, P., Carlander, D., Duncan, T. V., Measurement Methods to Detect, Characterize, and Quantify Engineered Nanomaterials in Foods, *Comprehensive Reviews in Food Science and Food Safety* **13**, 693–704 (2014).
- [2] Peters, R., ten Dam, G., Bouwmeester, H., Helsper, H., Allmaier, G., von der Kammer, F., Ramsch, R., Solans, C., Tomaniov'a, M., Hajslova, J., Weigel, S., Identification and characterization of organic nanoparticles in food, *Trends Anal. Chem.* **30**, 100–112 (2011).
